# Supplementary material
Source: PubMed Central journal article supplement (PMC5129629)
Supplement: NIHMS794571-supplement-10549_2016_3847_MOESM1_ESM.pdf [file NIHMS794571-supplement-10549_2016_3847_MOESM1_ESM.pdf]

**BREAST CANCERS FROM BLACK WOMEN EXHIBIT HIGHER NUMBERS OF IMMUNOSUPPRESSIVE MACROPHAGES WITH PROLIFERATIVE ACTIVITY AND OF CROWN LIKE STRUCTURES ASSOCIATED WITH LOWER SURVIVAL COMPARED TO NON-BLACK LATINAS AND CAUCASIANS.**

Tulay Koru-Sengul<sup>1,5,\*</sup>, Ana M. Santander<sup>2,\*</sup>, Feng Miao<sup>5</sup>, Lidia G. Sanchez<sup>2</sup>, Merce Jorda<sup>3,5</sup>, Stefan Glück<sup>4,5,&</sup>, Tan A. Ince<sup>3,5</sup>, Mehrad Nadji<sup>3,5</sup>, Zhibin Chen<sup>2,5</sup>, Manuel L Penichet<sup>6</sup>, Margot P. Cleary<sup>7</sup> and Marta Torroella-Kouri<sup>2,1,5</sup>.

<sup>1</sup>Department of Public Health Sciences, <sup>2</sup>Department of Microbiology and Immunology, <sup>3</sup>Department of Pathology, <sup>4</sup>Department of Medicine, <sup>5</sup>Sylvester Comprehensive Cancer Center, University of Miami Miller School of Medicine, Miami, FL, USA.

<sup>6</sup>Division of Surgical Oncology, Department of Surgery; Department of Microbiology, Immunology, and Molecular Genetics, David Geffen School of Medicine at UCLA; Jonsson Comprehensive Cancer Center, UCLA; UCLA AIDS Institute, and The Molecular Biology Institute, UCLA, Los Angeles, CA, USA.

<sup>7</sup>Hormel Institute, University of Minnesota, Austin, MN 55912, USA.

\* Share first authorship.

&Present affiliation: Celgene Corporation, Summit, NJ, USA.

**Corresponding Author**

Marta Torroella-Kouri, PhD

Department of Microbiology and Immunology

University of Miami Miller School of Medicine

1600 NW 10<sup>th</sup> Avenue Rosenstiel Medical School Building Suite 3123A

P.O. Box 016960 (R-138), Miami, Florida, 33101, USA

Phone: 305-243-6260; Fax: 305-243-5520; Email: [mtorroella@med.miami.edu](mailto:mtorroella@med.miami.edu)

Journal: Breast Cancer Research and Treatment.

**SUPPLEMENTARY MATERIAL:**  
**Supplementary Table 1**

| Variables                 | ALL              |       | Race              |      |                |      |                    |      | p-value*        |
|---------------------------|------------------|-------|-------------------|------|----------------|------|--------------------|------|-----------------|
|                           |                  |       | BL                |      | NBLA           |      | CA                 |      |                 |
|                           | N                | %     | n                 | %    | n              | %    | n                  | %    |                 |
| <b>ALL</b>                | 145              | 100.0 | 48                | 33.0 | 49             | 34.0 | 48                 | 33.0 |                 |
| <b>Age (years)</b>        |                  |       |                   |      |                |      |                    |      | <b>0.0195</b>   |
| n (missing)               | 145 (0)          |       | 48 (0)            |      | 49 (0)         |      | 48 (0)             |      |                 |
| Mean (sd)                 | 54.9 (12.4)      |       | 51.6 (12.7)       |      | 54.5 (12.2)    |      | 58.6 (11.5)        |      |                 |
| Median (Q1 ; Q3)          | 57 (47 ; 64)     |       | 55 (39.5 ; 59.5)  |      | 57 (47 ; 61)   |      | 60.5 (50 ; 65.5)   |      |                 |
| Min ; max                 | 27 ; 87          |       | 27 ; 87           |      | 28 ; 81        |      | 35 ; 84            |      |                 |
| <b>Follow-up (months)</b> |                  |       |                   |      |                |      |                    |      | <b>***</b>      |
| n (missing)               | 145 (0)          |       | 48 (0)            |      | 49 (0)         |      | 48 (0)             |      |                 |
| Mean (sd)                 | 117.3 (81)       |       | 106.6 (81.9)      |      | 114.2 (78.4)   |      | 131.1 (82.4)       |      |                 |
| Median (Q1 ; Q3)          | 116 (37.9 ; 184) |       | 81.5 (29.5 ; 168) |      | 104 (44 ; 176) |      | 145.5 (42.5 ; 191) |      |                 |
| Min ; max                 | 2 ; 326          |       | 6 ; 325           |      | 2 ; 286        |      | 12 ; 326           |      |                 |
| <b>Histology Type</b>     |                  |       |                   |      |                |      |                    |      | 0.2821          |
| Ductal                    | 127              | 87.6  | 42                | 87.5 | 46             | 93.9 | 39                 | 81.3 |                 |
| Lobular                   | 12               | 8.3   | 5                 | 10.4 | 1              | 2.0  | 6                  | 12.5 |                 |
| Other                     | 6                | 4.1   | 1                 | 2.1  | 2              | 4.1  | 3                  | 6.3  |                 |
| <b>T stage</b>            |                  |       |                   |      |                |      |                    |      | 0.1868          |
| T1                        | 56               | 38.6  | 15                | 31.3 | 18             | 36.7 | 23                 | 47.9 |                 |
| T2                        | 55               | 37.9  | 16                | 33.3 | 22             | 44.9 | 17                 | 35.4 |                 |
| T3                        | 13               | 9.0   | 7                 | 14.6 | 2              | 4.1  | 4                  | 8.3  |                 |
| T4                        | 18               | 12.4  | 7                 | 14.6 | 7              | 14.3 | 4                  | 8.3  |                 |
| Tx                        | 3                | 2.1   | 3                 | 6.3  |                |      |                    |      |                 |
| <b>N stage</b>            |                  |       |                   |      |                |      |                    |      | <b>0.0941</b>   |
| N0                        | 60               | 41.4  | 16                | 33.3 | 19             | 38.8 | 25                 | 52.1 |                 |
| N1                        | 33               | 22.8  | 10                | 20.8 | 14             | 28.6 | 9                  | 18.8 |                 |
| N2                        | 21               | 14.5  | 10                | 20.8 | 7              | 14.3 | 4                  | 8.3  |                 |
| N3                        | 25               | 17.2  | 7                 | 14.6 | 8              | 16.3 | 10                 | 20.8 |                 |
| Nx                        | 6                | 4.1   | 5                 | 10.4 | 1              | 2.0  |                    |      |                 |
| <b>M stage</b>            |                  |       |                   |      |                |      |                    |      | 0.6043          |
| M0                        | 128              | 88.3  | 41                | 85.4 | 45             | 91.8 | 42                 | 87.5 |                 |
| M1                        | 17               | 11.7  | 7                 | 14.6 | 4              | 8.2  | 6                  | 12.5 |                 |
| <b>LVI</b>                |                  |       |                   |      |                |      |                    |      | 0.2324          |
| No                        | 78               | 53.8  | 28                | 58.3 | 29             | 59.2 | 21                 | 43.8 |                 |
| Yes                       | 67               | 46.2  | 20                | 41.7 | 20             | 40.8 | 27                 | 56.3 |                 |
| <b>Stage</b>              |                  |       |                   |      |                |      |                    |      | <b>0.0832</b>   |
| I                         | 37               | 25.5  | 6                 | 12.5 | 12             | 24.5 | 19                 | 39.6 |                 |
| II                        | 50               | 34.5  | 18                | 37.5 | 20             | 40.8 | 12                 | 25.0 |                 |
| III                       | 41               | 28.3  | 17                | 35.4 | 13             | 26.5 | 11                 | 22.9 |                 |
| IV                        | 17               | 11.7  | 7                 | 14.6 | 4              | 8.2  | 6                  | 12.5 |                 |
| <b>Recurrence</b>         |                  |       |                   |      |                |      |                    |      | <b>0.0762</b>   |
| No                        | 62               | 42.8  | 15                | 31.3 | 21             | 42.9 | 26                 | 54.2 |                 |
| Yes                       | 83               | 57.2  | 33                | 68.8 | 28             | 57.1 | 22                 | 45.8 |                 |
| <b>Vital Status</b>       |                  |       |                   |      |                |      |                    |      | 0.1051          |
| Alive                     | 57               | 39.3  | 15                | 31.3 | 18             | 36.7 | 24                 | 50.0 |                 |
| Dead                      | 88               | 60.7  | 33                | 68.8 | 31             | 63.3 | 24                 | 50.0 |                 |
| <b>ER status</b>          |                  |       |                   |      |                |      |                    |      | <b>0.0261**</b> |
| Negative                  | 57               | 39.3  | 22                | 45.8 | 24             | 49.0 | 11                 | 22.9 |                 |
| Positive                  | 86               | 59.3  | 26                | 54.2 | 25             | 51.0 | 35                 | 72.9 |                 |
| Unknown                   | 2                | 1.4   |                   |      |                |      | 2                  | 4.2  |                 |
| <b>PR status</b>          |                  |       |                   |      |                |      |                    |      | 0.1614**        |
| Negative                  | 60               | 41.4  | 22                | 45.8 | 25             | 51.0 | 13                 | 27.1 |                 |
| Positive                  | 74               | 51.0  | 24                | 50.0 | 23             | 46.9 | 27                 | 56.3 |                 |
| Unknown                   | 11               | 7.6   | 2                 | 4.2  | 1              | 2.0  | 8                  | 16.7 |                 |
| <b>HER-2 status</b>       |                  |       |                   |      |                |      |                    |      | 0.7909          |
| Negative                  | 128              | 88.3  | 43                | 89.6 | 42             | 85.7 | 43                 | 89.6 |                 |
| Positive                  | 17               | 11.7  | 5                 | 10.4 | 7              | 14.3 | 5                  | 10.4 |                 |
| <b>Grade</b>              |                  |       |                   |      |                |      |                    |      | 0.1121          |
| I                         | 22               | 15.2  | 5                 | 10.4 | 8              | 16.3 | 9                  | 18.8 |                 |
| II                        | 75               | 51.7  | 24                | 50.0 | 21             | 42.9 | 30                 | 62.5 |                 |
| III                       | 48               | 33.1  | 19                | 39.6 | 20             | 40.8 | 9                  | 18.8 |                 |
| <b>Any Treatment</b>      |                  |       |                   |      |                |      |                    |      | 0.4706          |
| Unknown                   | 14               | 9.7   | 6                 | 12.5 | 3              | 6.1  | 5                  | 10.4 |                 |
| No                        | 18               | 12.4  | 4                 | 8.3  | 6              | 12.2 | 8                  | 16.7 |                 |
| Yes                       | 113              | 77.9  | 38                | 79.2 | 40             | 81.6 | 35                 | 72.9 |                 |
| <b>Chemotherapy</b>       |                  |       |                   |      |                |      |                    |      | <b>0.0057**</b> |
| Unknown                   | 14               | 9.7   | 6                 | 12.5 | 3              | 6.1  | 5                  | 10.4 |                 |
| No                        | 78               | 53.8  | 22                | 45.8 | 22             | 44.9 | 34                 | 70.8 |                 |
| Yes                       | 53               | 36.6  | 20                | 41.7 | 24             | 49.0 | 9                  | 18.8 |                 |
| <b>Radiation Therapy</b>  |                  |       |                   |      |                |      |                    |      | 0.4749**        |
| Unknown                   | 14               | 9.7   | 6                 | 12.5 | 3              | 6.1  | 5                  | 10.4 |                 |
| No                        | 91               | 62.8  | 28                | 58.3 | 35             | 71.4 | 28                 | 58.3 |                 |
| Yes                       | 40               | 27.6  | 14                | 29.2 | 11             | 22.4 | 15                 | 31.3 |                 |
| <b>Hormonal Therapy</b>   |                  |       |                   |      |                |      |                    |      | 0.3287**        |
| Unknown                   | 14               | 9.7   | 6                 | 12.5 | 3              | 6.1  | 5                  | 10.4 |                 |
| No                        | 76               | 52.4  | 26                | 54.2 | 29             | 59.2 | 21                 | 43.8 |                 |
| Yes                       | 55               | 37.9  | 16                | 33.3 | 17             | 34.7 | 22                 | 45.8 |                 |

\*p-value is from one-way ANOVA for testing means or Chi-square or Fisher's exact test for testing the proportion among races. \*\*Unknown category were excluded from Chi-Square test. \*\*\*test for mean differences is not applicable due to censoring.

## Supplementary Table 2 (A and B)

Table 2A

|                                | All                  | Race                       |                             |                            | p-value*         |
|--------------------------------|----------------------|----------------------------|-----------------------------|----------------------------|------------------|
|                                |                      | BL                         | NBLA                        | CA                         |                  |
| <b>Density of TAMs (CD163)</b> |                      |                            |                             |                            | <b>&lt;.0001</b> |
| n (missing)                    | 145 (0)              | 48 (0)                     | 49 (0)                      | 48 (0)                     |                  |
| Mean (sd)                      | 105.06 (82.07)       | 142.21 <sup>a</sup> (89.3) | 110.16 <sup>a</sup> (75.23) | 62.72 <sup>b</sup> (60.11) |                  |
| Median (Q1 ; Q3)               | 82.54 (38.1 ; 156.1) | 137.15 (68.79 ; 195.2)     | 96.03 (38.62 ; 166.1)       | 47.49 (18.92 ; 91.52)      |                  |
| Min ; max                      | 2.91 ; 395.5         | 21.69 ; 395.5              | 8.2 ; 271.2                 | 2.91 ; 269.6               |                  |

\*p-value is from one-way ANOVA for testing the mean differences among races where pairwise comparison were done by Bonferroni t-test.

Table 2B

|                              | All |       | Race |      |      |      |    |      | p-value           |
|------------------------------|-----|-------|------|------|------|------|----|------|-------------------|
|                              |     |       | BL   |      | NBLA |      | CA |      |                   |
|                              | n   | %     | n    | %    | n    | %    | n  | %    |                   |
| All                          | 145 | 100.0 | 48   | 33.0 | 49   | 34.0 | 48 | 33.0 |                   |
| <b>Qual. Density (CD163)</b> |     |       |      |      |      |      |    |      | <b>0.0009</b>     |
| 1+                           | 100 | 69.0  | 25   | 52.1 | 33   | 67.3 | 42 | 87.5 |                   |
| 2+                           | 44  | 30.3  | 22   | 45.8 | 16   | 32.7 | 6  | 12.5 |                   |
| 3+                           | 1   | 0.7   | 1    | 2.1  |      |      |    |      |                   |
| <b>Qual. Density (CD206)</b> |     |       |      |      |      |      |    |      | <b>0.0238</b>     |
| 1+                           | 91  | 62.8  | 22   | 45.8 | 32   | 65.3 | 37 | 77.1 |                   |
| 2+                           | 41  | 28.3  | 18   | 37.5 | 14   | 28.6 | 9  | 18.8 |                   |
| 3+                           | 13  | 9.0   | 8    | 16.7 | 3    | 6.1  | 2  | 4.2  |                   |
| <b>Qual. Density (CD40)</b>  |     |       |      |      |      |      |    |      | <b>&lt;0.0001</b> |
| 0                            | 111 | 76.6  | 42   | 87.5 | 48   | 98.0 | 21 | 43.8 |                   |
| 1+                           | 32  | 22.1  | 4    | 8.3  | 1    | 2.0  | 27 | 56.3 |                   |
| 2+                           | 2   | 1.4   | 2    | 4.2  | -    | -    | -  | -    |                   |

\*p-value is from Chi-square or Fisher's exact test for testing the proportion differences among races.

## Supplementary Table 3 (A and B)

Table 3A

| Variables                          |                 | All                   | Race                      |                            |                         | p value |
|------------------------------------|-----------------|-----------------------|---------------------------|----------------------------|-------------------------|---------|
|                                    |                 |                       | BL                        | NBLA                       | CA                      |         |
| Density of CD163 (cells/mm2)       | N (missing)     | 23 (0)                | 8 (0)                     | 7 (0)                      | 8 (0)                   | 0.0701  |
|                                    | Mean (sd)       | 208 (62.1)            | 236.9 (63.4) <sup>a</sup> | 219.7 (44.5) <sup>ab</sup> | 169 (59.9) <sup>b</sup> |         |
|                                    | Median (Q1, Q3) | 196 (156.1 ; 266.7)   | 233.1 (186.4 ; 281)       | 231 (166.1 ; 266.7)        | 156 (130.2 ; 207.6)     |         |
|                                    | Min, max        | 94.7 ; 338.6          | 155.8 ; 338.6             | 165.1 ; 271.2              | 94.7 ; 269.6            |         |
| Average # of cells of CD163/Ki67+  | N (missing)     | 23 (0)                | 8 (0)                     | 7 (0)                      | 8 (0)                   | 0.1614  |
|                                    | Mean (sd)       | 4.6 (3.8)             | 6.6 (4.8)                 | 3 (1.6)                    | 4 (3.6)                 |         |
|                                    | Median (Q1, Q3) | 4 (2 ; 6)             | 4.5 (4 ; 9.5)             | 3 (2 ; 4)                  | 3 (1.5 ; 5)             |         |
|                                    | Min, max        | 1 ; 16                | 1 ; 16                    | 1 ; 6                      | 1 ; 12                  |         |
| Density of CD163/Ki67+ (cells/mm2) | N (missing)     | 23 (0)                | 8 (0)                     | 7 (0)                      | 8 (0)                   | 0.1613  |
|                                    | Mean (sd)       | 16.5 (13.7)           | 23.7 (17.1)               | 10.7 (5.8)                 | 14.3 (12.9)             |         |
|                                    | Median (Q1, Q3) | 14.3 (7.1 ; 21.4)     | 16.1 (14.3 ; 33.9)        | 10.7 (7.1 ; 14.3)          | 10.7 (5.4 ; 17.9)       |         |
|                                    | Min, max        | 3.6 ; 57.1            | 3.6 ; 57.1                | 3.6 ; 21.4                 | 3.6 ; 42.9              |         |
| Ratio                              | N (missing)     | 23 (0)                | 8 (0)                     | 7 (0)                      | 8 (0)                   | 0.3239  |
|                                    | Mean (sd)       | 0.081 (0.06)          | 0.095 (0.053)             | 0.052 (0.03)               | 0.091 (0.081)           |         |
|                                    | Median (Q1, Q3) | 0.075 (0.036 ; 0.102) | 0.093 (0.062 ; 0.119)     | 0.04 (0.026 ; 0.087)       | 0.083 (0.042 ; 0.097)   |         |
|                                    | Min, max        | 0.013 ; 0.275         | 0.018 ; 0.194             | 0.015 ; 0.093              | 0.013 ; 0.275           |         |

\* Ratio is the total dividing TAMs (CD163+/Ki-67+) divided by the total # of TAMs (CD163+). P value is from ANOVA for testing the mean differences among race where pairwise comparison were done by Bonferroni t-test,

Table 3B

| Variables                          |                 | All                 | Race                       |                            |                            | p value |
|------------------------------------|-----------------|---------------------|----------------------------|----------------------------|----------------------------|---------|
|                                    |                 |                     | BL                         | NBLA                       | CA                         |         |
| Density of CD163 (cells/mm2)       | N (missing)     | 23 (0)              | 8 (0)                      | 7 (0)                      | 8 (0)                      | 0.0701  |
|                                    | Mean (sd)       | 208 (62.1)          | 236.9 (63.4) <sup>a</sup>  | 219.7 (44.5) <sup>ab</sup> | 169 (59.9) <sup>b</sup>    |         |
|                                    | Median (Q1, Q3) | 196 (156.1 ; 266.7) | 233.1 (186.4 ; 281)        | 231 (166.1 ; 266.7)        | 156 (130.2 ; 207.6)        |         |
|                                    | Min, max        | 94.7 ; 338.6        | 155.8 ; 338.6              | 165.1 ; 271.2              | 94.7 ; 269.6               |         |
| Average # of cells of CD163/Ki67+  | N (missing)     | 23 (0)              | 8 (0)                      | 7 (0)                      | 8 (0)                      | 0.0107  |
|                                    | Mean (sd)       | 1.7 (1.7)           | 3 (1.5) <sup>a</sup>       | 1 (1.5) <sup>b</sup>       | 0.9 (1.1) <sup>b</sup>     |         |
|                                    | Median (Q1, Q3) | 1 (0 ; 3)           | 3.5 (1.5 ; 4)              | 0 (0 ; 2)                  | 0.5 (0 ; 1.5)              |         |
|                                    | Min, max        | 0 ; 5               | 1 ; 5                      | 0 ; 4                      | 0 ; 3                      |         |
| Density of CD163/Ki67+ (cells/mm2) | N (missing)     | 23 (0)              | 8 (0)                      | 7 (0)                      | 8 (0)                      | 0.0107  |
|                                    | Mean (sd)       | 5.9 (6)             | 10.7 (5.4) <sup>a</sup>    | 3.6 (5.5) <sup>b</sup>     | 3.1 (4) <sup>b</sup>       |         |
|                                    | Median (Q1, Q3) | 3.6 (0 ; 10.7)      | 12.5 (5.4 ; 14.3)          | 0 (0 ; 7.1)                | 1.8 (0 ; 5.4)              |         |
|                                    | Min, max        | 0 ; 17.9            | 3.6 ; 17.9                 | 0 ; 14.3                   | 0 ; 10.7                   |         |
| Ratio                              | N (missing)     | 23 (0)              | 8 (0)                      | 7 (0)                      | 8 (0)                      | 0.0353  |
|                                    | Mean (sd)       | 0.027 (0.024)       | 0.044 (0.018) <sup>a</sup> | 0.018 (0.025) <sup>b</sup> | 0.017 (0.021) <sup>b</sup> |         |
|                                    | Median (Q1, Q3) | 0.02 (0 ; 0.046)    | 0.044 (0.03 ; 0.058)       | 0 (0 ; 0.043)              | 0.007 (0 ; 0.04)           |         |
|                                    | Min, max        | 0 ; 0.07            | 0.018 ; 0.07               | 0 ; 0.062                  | 0 ; 0.046                  |         |

\* Ratio is the total dividing TAMs (CD163+/Ki-67+) divided by the total # of TAMs (CD163+). P value is from ANOVA for testing the mean differences among race where pairwise comparison were done by Bonferroni t-test,

## Supplementary Table 4

| Variables                          |                 | All                 | ER status           |                       | p value |
|------------------------------------|-----------------|---------------------|---------------------|-----------------------|---------|
|                                    |                 |                     | Positive            | Negative              |         |
| Density of CD163 (cells/mm2)       | N (missing)     | 23 (0)              | 9 (0)               | 14 (0)                | 0.0269  |
|                                    | Mean (sd)       | 208 (62.1)          | 173.1 (38.2)        | 230.5 (65.2)          |         |
|                                    | Median (Q1, Q3) | 196 (156.1 ; 266.7) | 176.7 (156.1 ; 196) | 251.6 (165.1 ; 269.6) |         |
|                                    | Min, max        | 94.7 ; 338.6        | 94.7 ; 231          | 104.8 ; 338.6         |         |
| Average # of cells of CD163/Ki67+  | N (missing)     | 23 (0)              | 9 (0)               | 14 (0)                | 0.4752  |
|                                    | Mean (sd)       | 1.7 (1.7)           | 1.3 (1.7)           | 1.9 (1.7)             |         |
|                                    | Median (Q1, Q3) | 1 (0 ; 3)           | 1 (0 ; 2)           | 1.5 (0 ; 3)           |         |
|                                    | Min, max        | 0 ; 5               | 0 ; 4               | 0 ; 5                 |         |
| Density of CD163/Ki67+ (cells/mm2) | N (missing)     | 23 (0)              | 9 (0)               | 14 (0)                | 0.4755  |
|                                    | Mean (sd)       | 5.9 (6)             | 4.8 (5.9)           | 6.6 (6.1)             |         |
|                                    | Median (Q1, Q3) | 3.6 (0 ; 10.7)      | 3.6 (0 ; 7.1)       | 5.4 (0 ; 10.7)        |         |
|                                    | Min, max        | 0 ; 17.9            | 0 ; 14.3            | 0 ; 17.9              |         |

\*p-value is from Student's t-test for testing the mean differences among hormonal status.

## Supplementary Table 5

| Variables                                       |                  | PR status             |                       |                       | p value |
|-------------------------------------------------|------------------|-----------------------|-----------------------|-----------------------|---------|
|                                                 |                  | All                   | Positive              | Negative              |         |
| Density of CD163 (cells/mm <sup>2</sup> )       | N (missing)      | 21 (0)                | 7 (0)                 | 14 (0)                | 0.0722  |
|                                                 | Mean (sd)        | 214 (59.7)            | 181 (27.6)            | 230.5 (65.2)          |         |
|                                                 | Median (Q1 , Q3) | 204.5 (165.1 ; 266.7) | 176.7 (156.1 ; 204.5) | 251.6 (165.1 ; 269.6) |         |
|                                                 | Min , max        | 104.8 ; 338.6         | 155.8 ; 231           | 104.8 ; 338.6         |         |
| Average # of cells of CD163/Ki67+               | N (missing)      | 21 (0)                | 7 (0)                 | 14 (0)                | 0.7265  |
|                                                 | Mean (sd)        | 1.8 (1.7)             | 1.6 (1.8)             | 1.9 (1.7)             |         |
|                                                 | Median (Q1 , Q3) | 1 (0 ; 3)             | 1 (0 ; 4)             | 1.5 (0 ; 3)           |         |
|                                                 | Min , max        | 0 ; 5                 | 0 ; 4                 | 0 ; 5                 |         |
| Density of CD163/Ki67+ (cells/mm <sup>2</sup> ) | N (missing)      | 21 (0)                | 7 (0)                 | 14 (0)                | 0.7268  |
|                                                 | Mean (sd)        | 6.3 (6.1)             | 5.6 (6.5)             | 6.6 (6.1)             |         |
|                                                 | Median (Q1 , Q3) | 3.6 (0 ; 10.7)        | 3.6 (0 ; 14.3)        | 5.4 (0 ; 10.7)        |         |
|                                                 | Min , max        | 0 ; 17.9              | 0 ; 14.3              | 0 ; 17.9              |         |

\*p-value is from Student's t-test for testing the mean differences among hormonal status.

## Supplementary Table 6

| Variables                                       |                  | All                 | HER status            |                       | p value |
|-------------------------------------------------|------------------|---------------------|-----------------------|-----------------------|---------|
|                                                 |                  |                     | Positive              | Negative              |         |
| Density of CD163 (cells/mm <sup>2</sup> )       | N (missing)      | 23 (0)              | 3 (0)                 | 20 (0)                | 0.7466  |
|                                                 | Mean (sd)        | 208 (62.1)          | 196.8 (63.2)          | 209.7 (63.5)          |         |
|                                                 | Median (Q1 , Q3) | 196 (156.1 ; 266.7) | 165.1 (155.8 ; 269.6) | 200.3 (161.1 ; 264.2) |         |
|                                                 | Min , max        | 94.7 ; 338.6        | 155.8 ; 269.6         | 94.7 ; 338.6          |         |
| Average # of cells of CD163/Ki67+               | N (missing)      | 23 (0)              | 3 (0)                 | 20 (0)                | 0.9876  |
|                                                 | Mean (sd)        | 1.7 (1.7)           | 1.7 (0.6)             | 1.7 (1.8)             |         |
|                                                 | Median (Q1 , Q3) | 1 (0 ; 3)           | 2 (1 ; 2)             | 1 (0 ; 3.5)           |         |
|                                                 | Min , max        | 0 ; 5               | 1 ; 2                 | 0 ; 5                 |         |
| Density of CD163/Ki67+ (cells/mm <sup>2</sup> ) | N (missing)      | 23 (0)              | 3 (0)                 | 20 (0)                | 0.9881  |
|                                                 | Mean (sd)        | 5.9 (6)             | 6 (2.1)               | 5.9 (6.4)             |         |
|                                                 | Median (Q1 , Q3) | 3.6 (0 ; 10.7)      | 7.1 (3.6 ; 7.1)       | 3.6 (0 ; 12.5)        |         |
|                                                 | Min , max        | 0 ; 17.9            | 3.6 ; 7.1             | 0 ; 17.9              |         |

\*p-value is from Student's t-test for testing the mean differences among hormonal status.

## Supplementary Table 7

| Variables              |                  | All             | Race                     |                           |                          | p-value* |
|------------------------|------------------|-----------------|--------------------------|---------------------------|--------------------------|----------|
|                        |                  |                 | BL                       | NBLA                      | CA                       |          |
| Density of CLS (CD163) | n (missing)      | 145 (0)         | 48 (0)                   | 49 (0)                    | 48 (0)                   | 0.0167   |
|                        | Mean (sd)        | 0.06 (0.14)     | 0.11 <sup>a</sup> (0.22) | 0.05 <sup>ab</sup> (0.08) | 0.03 <sup>b</sup> (0.07) |          |
|                        | Median (Q1 ; Q3) | 0.01 (0 ; 0.04) | 0.03 (0 ; 0.09)          | 0.02 (0 ; 0.04)           | 0 (0 ; 0.02)             |          |
|                        | Min ; max        | 0 ; 1.12        | 0 ; 1.12                 | 0 ; 0.35                  | 0 ; 0.38                 |          |
| Density of CLS (CD206) | n (missing)      | 145 (0)         | 48 (0)                   | 49 (0)                    | 48 (0)                   | 0.6374   |
|                        | Mean (sd)        | 0.03 (0.07)     | 0.04 (0.09)              | 0.03 (0.05)               | 0.02 (0.06)              |          |
|                        | Median (Q1 ; Q3) | 0 (0 ; 0.02)    | 0 (0 ; 0.02)             | 0.01 (0 ; 0.02)           | 0 (0 ; 0.03)             |          |
|                        | Min ; max        | 0 ; 0.45        | 0 ; 0.45                 | 0 ; 0.23                  | 0 ; 0.29                 |          |
| Density of CLS (CD40)  | n (missing)      | 145 (0)         | 48 (0)                   | 49 (0)                    | 48 (0)                   | 0.2826   |
|                        | Mean (sd)        | 0.01 (0.07)     | 0.02 (0.11)              | 0 (0)                     | 0 (0.02)                 |          |
|                        | Median (Q1 ; Q3) | 0 (0 ; 0)       | 0 (0 ; 0)                | 0 (0 ; 0)                 | 0 (0 ; 0)                |          |
|                        | Min ; max        | 0 ; 0.77        | 0 ; 0.77                 | 0 ; 0                     | 0 ; 0.13                 |          |

\*p-value is from ANOVA for testing the mean differences among races.

\*\* Pairwise comparison were done by Bonferroni t Test.

## Supplementary Table 8

| Rate (%)<br>Time(months) | Overall Survival (%) |       |       |       | Progression Free Survival (%) |       |       |       |
|--------------------------|----------------------|-------|-------|-------|-------------------------------|-------|-------|-------|
|                          | All                  | BL    | NBLA  | CA    | All                           | BL    | NBLA  | CA    |
| 0                        | 100.0                | 100.0 | 100.0 | 100.0 | 100.0                         | 100.0 | 100.0 | 100.0 |
| 12                       | 95.2                 | 91.7  | 95.9  | 97.9  | 88.3                          | 85.4  | 87.8  | 91.7  |
| 24                       | 86.9                 | 85.3  | 89.8  | 85.4  | 75.2                          | 70.8  | 77.6  | 77.1  |
| 36                       | 76.4                 | 70.3  | 79.6  | 79.2  | 64.1                          | 58.3  | 59.2  | 75.0  |
| 60                       | 67.4                 | 64.0  | 65.3  | 72.9  | 57.2                          | 50.0  | 57.1  | 64.6  |
| 90                       | 58.1                 | 49.0  | 54.8  | 70.7  | 50.3                          | 41.7  | 48.9  | 60.4  |
| 120                      | 56.6                 | 49.0  | 50.0  | 70.7  | 48.0                          | 39.5  | 46.4  | 58.1  |

**Supplementary Fig. 1**

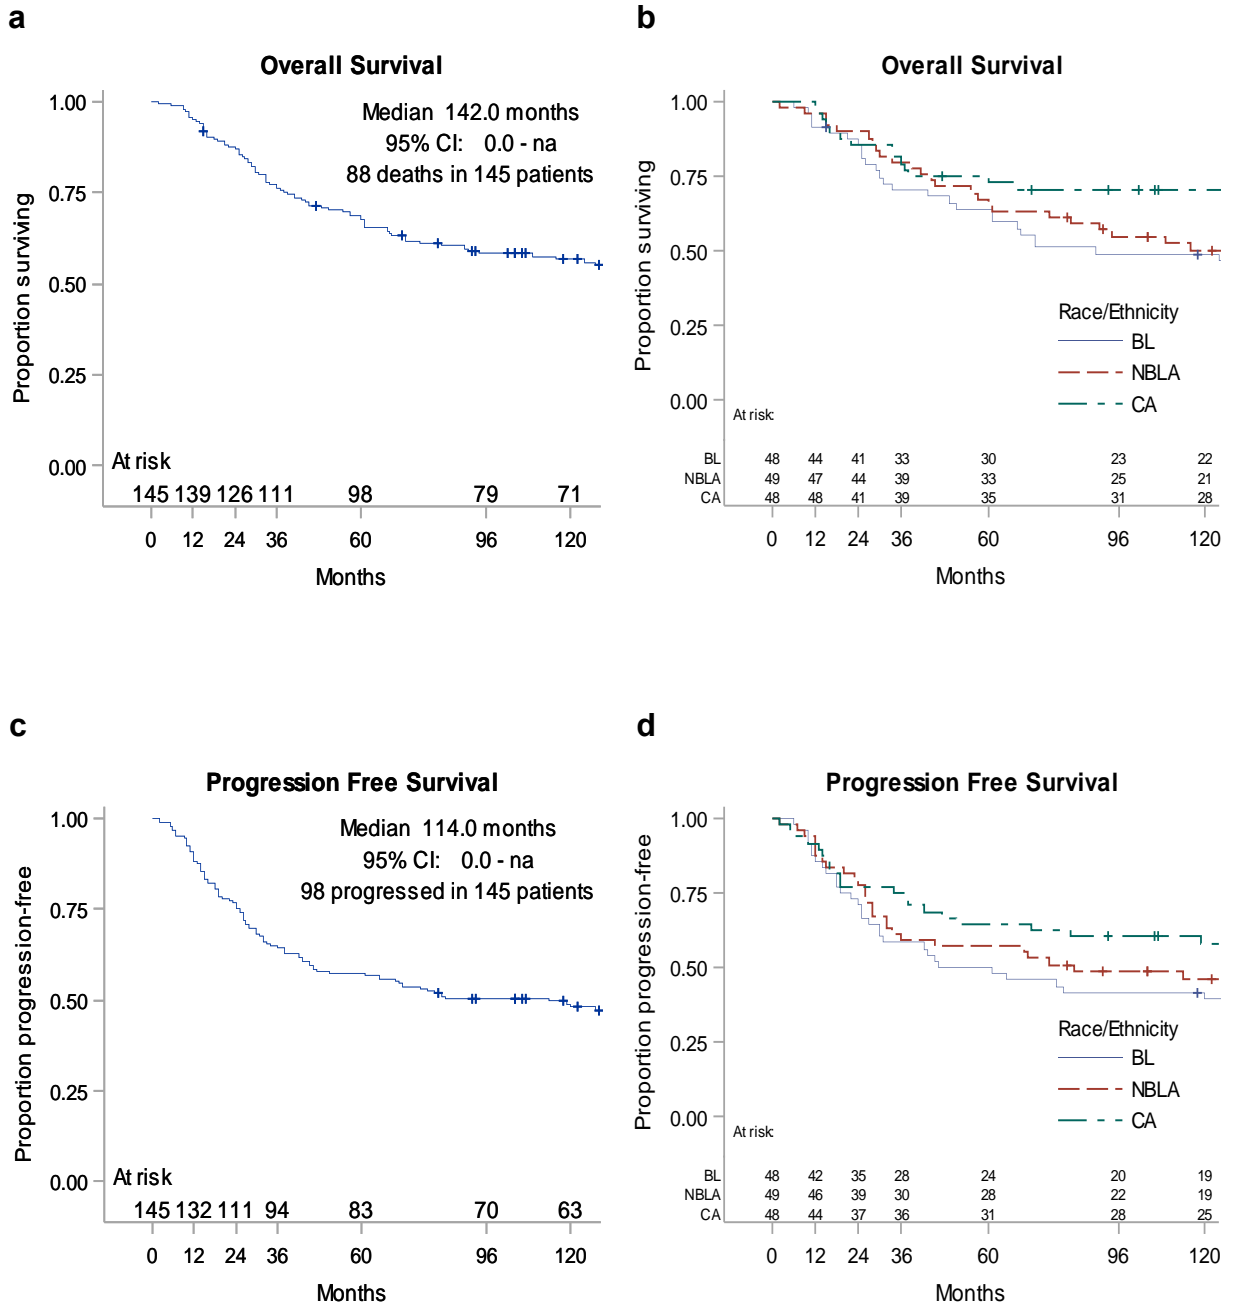

**Supplementary Fig. 1 Kaplan-Meier survival curves illustrating the overall survival (OS) and progression free survival (PFS) in all patients and different racial groups.** a: OS in all patients with median survival rate and 95% CI. b: OS in three racial groups which showed that survival rates for BL patients were lower than NBLA and CA patients, and survival rates for NBLA were lower than for CA. c: PFS in all patients with median survival rate and 95% CI. d: PFS in three racial groups which showed same pattern as OS.
